# Supplementary material for: Site specific descriptors for oxygen evolution reaction activity on single atom catalysts using QMML
Source: Royal Society of Chemistry journal article supplement (doi:10.1039/d4ta02610a), 2024-01-01
Supplement: d4ta02610a1.pdf [file d4ta02610a1.pdf]

## Site Specific Descriptor for Oxygen Evolution Reaction Activity on Single Atom Catalysts Using QMML

Erakulan E. Siddharthan<sup>a</sup>, Sourav Ghosh<sup>a</sup>, Ranjit Thapa<sup>a,b,\*</sup>

<sup>a</sup>Department of Physics, SRM University—AP, Amaravati, Andhra Pradesh 522 240, India

<sup>b</sup>Center for Computational and Integrative Sciences, SRM University—AP, Amaravati, Andhra Pradesh 522 240, India

\*Corresponding Author: [ranjit.t@srmmap.edu.in](mailto:ranjit.t@srmmap.edu.in)

Free energy calculation:

The free energy of each molecule and intermediate is  $G = E + \text{ZPE} - TS - neU$ , where  $E$  is the DFT energy, ZPE is the zero-point energy,  $TS$  is the entropic term,  $n$  is the number of electrons transferred and  $U$  is the applied potential at the electrode. The ZPE and  $TS$  terms for adsorbed intermediates are small and negligible. The equilibrium potential ( $U_0$ ) is 0.40 V vs SHE in the alkaline medium at the pH of 14.

The following free energy relations of ion/molecules to fix the total free energy of the overall reaction at 4.92 eV as given by Norskov et al<sup>1</sup>.,

$$G_{H_2O(l)} = G_{H_2O(g)} + RT \ln \left( \frac{p}{p_0} \right) \quad \dots(1)$$

$$G_{O_2(g)} = 2G_{H_2O(l)} - 2G_{H_2} + 4.92 \quad \dots(2)$$

$$G_{OH^-} = G_{H_2O(l)} - G_{H^+} \quad \dots(3)$$

$$G_{H^+} = \frac{1}{2}G_{H_2} - k_B T \ln 10 \times \text{pH} \quad \dots(4)$$

where  $R$  is the gas constant,  $T = 298.15$  K,  $p = 0.035$  bar and  $p_0 = 1$  bar.

The DFT energies, entropy terms and zero point energies for free molecules are given in table.

| Molecule             | E (eV)  | TS (eV) | ZPE (eV) | G (eV)  |
|----------------------|---------|---------|----------|---------|
| H <sub>2</sub>       | -6.76   | 0.41    | 0.27     | -6.9    |
| H <sub>2</sub> O (g) | -14.229 | 0.67    | 0.59     | -14.307 |

Table S1: Relative DFT energies of Co, Fe and Ni on pristine AGNRs and ZGNRs for three N4 configurations considered.

| System | Relative average total energy (eV) |                 |                 |
|--------|------------------------------------|-----------------|-----------------|
|        | N <sub>4</sub>                     | N <sub>4T</sub> | N <sub>4E</sub> |
| aCo    | 1.36                               | 0.52            | 0               |
| aFe    | 1.47                               | 0.73            | 0               |
| aNi    | 1.20                               | 0.46            | 0               |
| zCo    | 0.84                               | 1.68            | 0               |
| zFe    | 0.86                               | 1.68            | 0               |
| zNi    | 0.73                               | 1.53            | 0               |

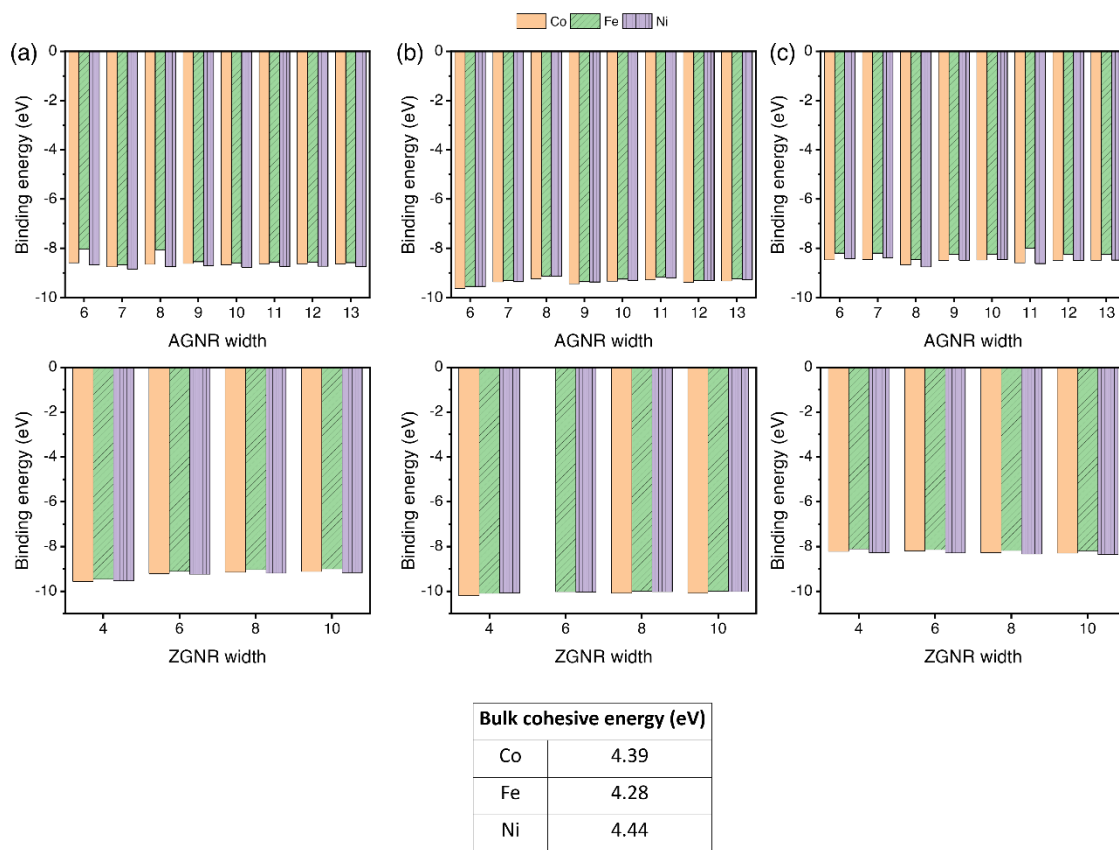

**Figure S1.** Binding energies of Co, Fe and Ni on (a)  $N_4$  (b)  $N_{4E}$  and (c)  $N_{4T}$  configurations on AGNRs.

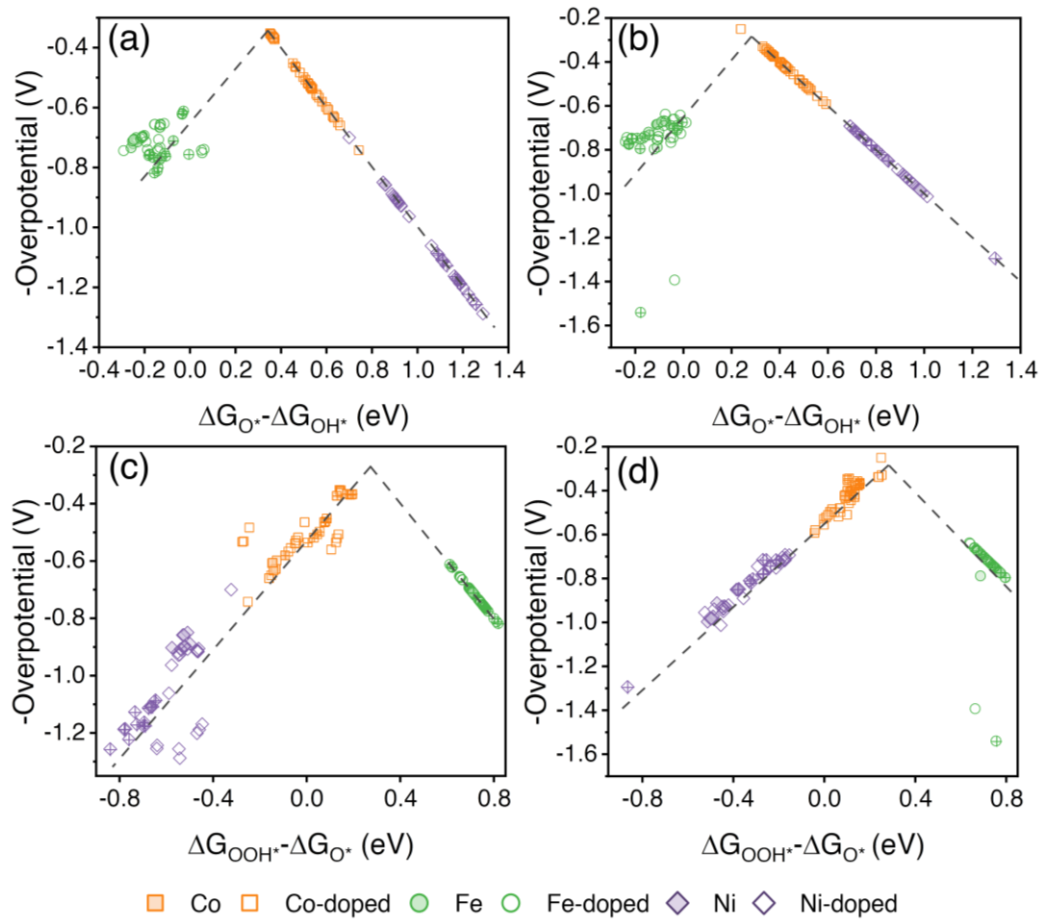

**Figure S2.**  $\Delta G_{O^*} - \Delta G_{OH^*}$  versus negative of overpotentials for configurations (a)  $N_{4E}$  and (b)  $N_{4T}$ .  $\Delta G_{OOH^*} - \Delta G_{O^*}$  versus negative of overpotentials for configurations (c)  $N_{4E}$  and (d)  $N_{4T}$ . Shapes without '+' sign indicate AGNRs and with '+' sign indicate ZGNRs.

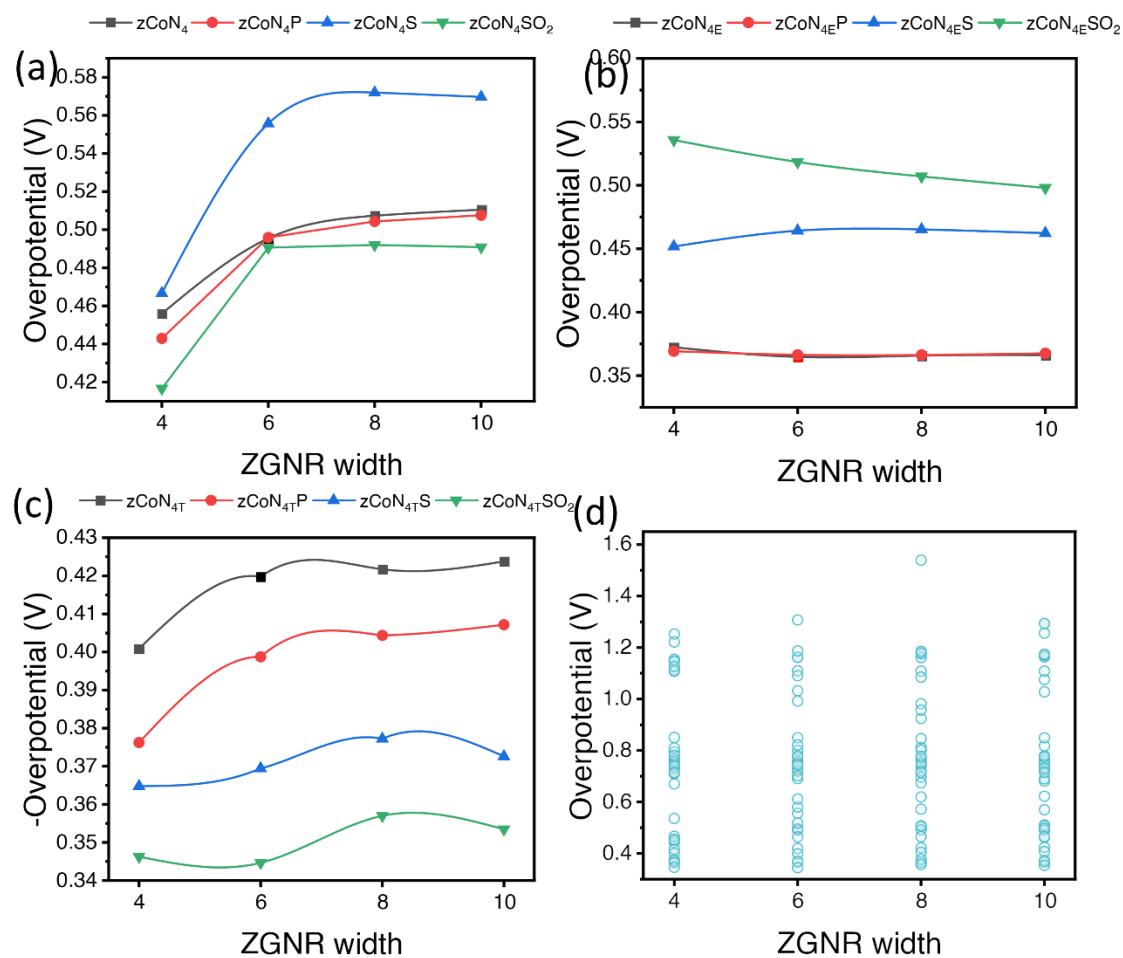

**Figure S3.** Overpotential variation with width of the pristine and doped ZGNR for the metals considered in (a)  $N_4$  (b)  $N_{4E}$  and (c)  $N_{4T}$  configurations. (d) Overpotential distribution over the widths of the ZGNR.

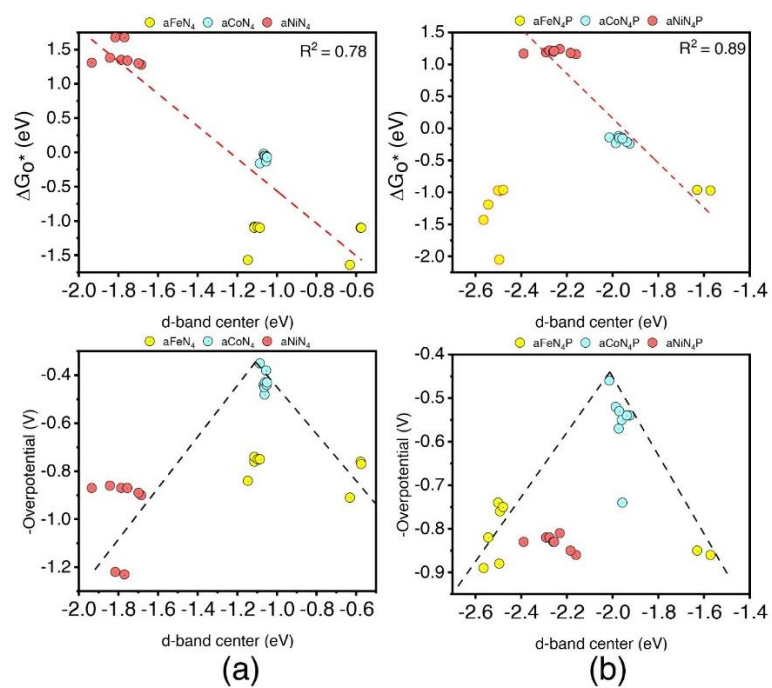

**Figure S4.** (a) d-band center vs  $\Delta G_{O^*}$  and OER overpotentials of Fe, Co and Ni on aN<sub>4</sub> hosts. (b) d-band center vs  $\Delta G_{O^*}$  and OER overpotentials of Fe, Co and Ni on aN<sub>4</sub>P hosts.

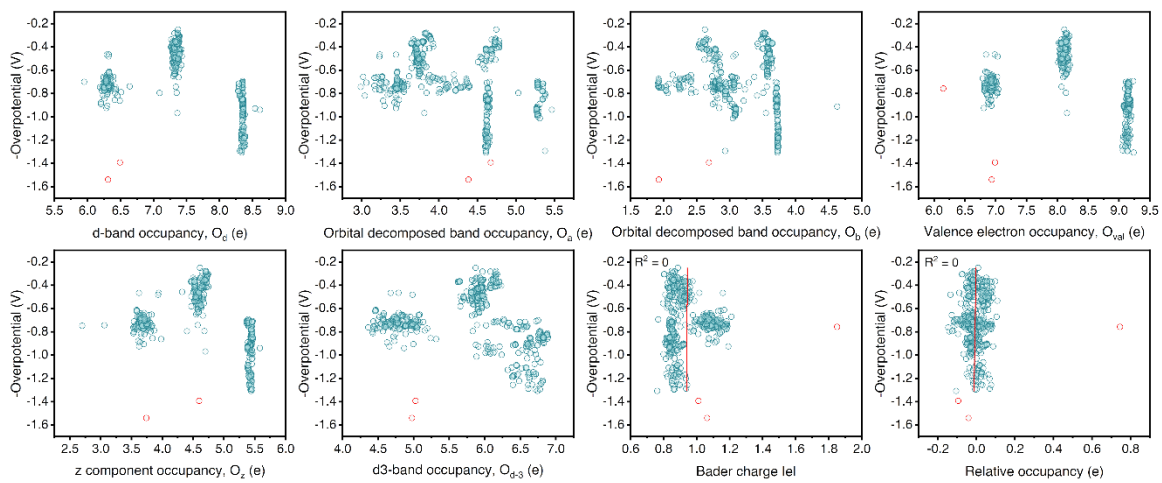

**Figure S5.** Occupancy and Bader charge based descriptors vs overpotentials.

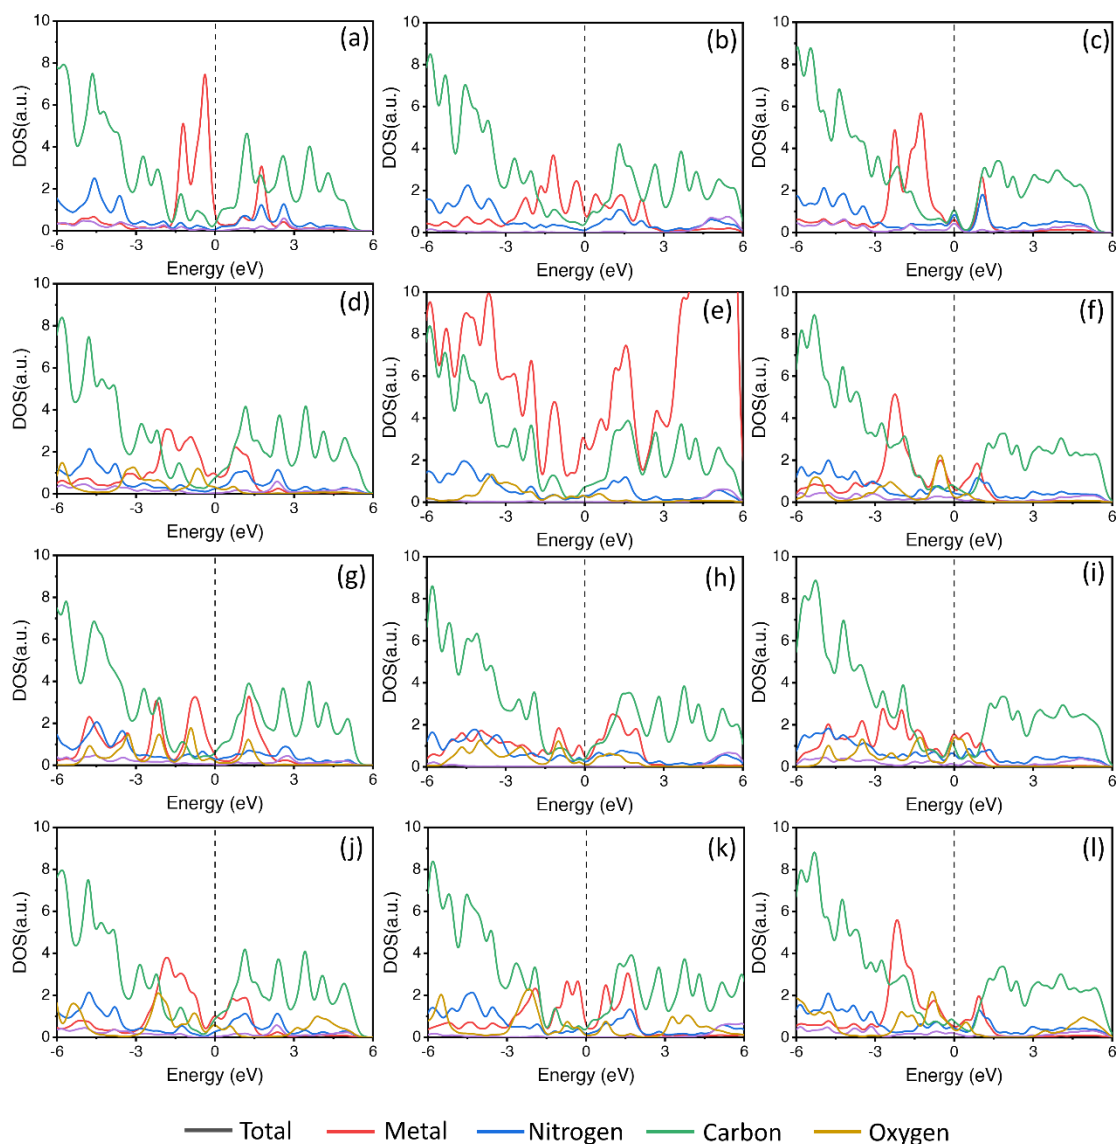

**Figure S6.** Atom projected density of states the systems (a)  $6\text{aCoN}_4\text{S}$  (b)  $6\text{aFeN}_4\text{E}\text{SO}_2$  and (c)  $6\text{aNiN}_4\text{E}\text{S}$ . Atom projected density of states for the same system after adsorption of (d), (e) and (f)  $\text{OH}^*$ , (g), (h) and (i)  $\text{O}^*$  and (g), (h) and (i)  $\text{OOH}^*$ . Dashed vertical line represents Fermi level.

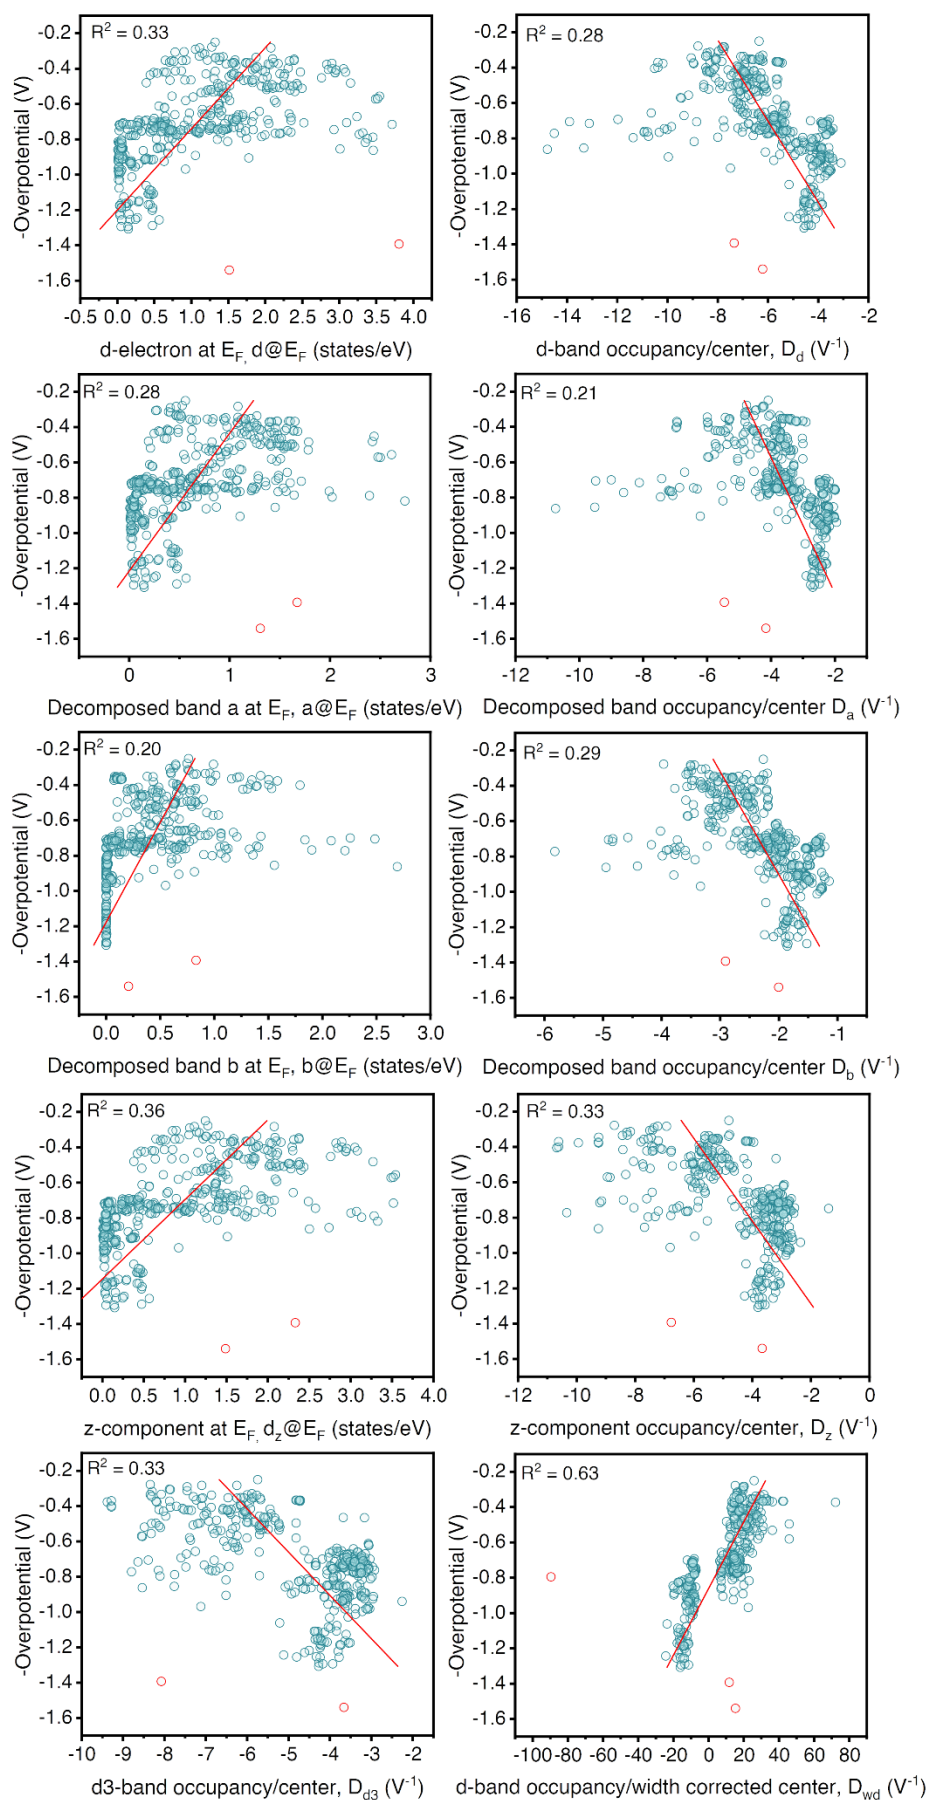

**Figure S7.** Density of states at Fermi level and band center scaled occupancy based descriptors vs overpotentials.



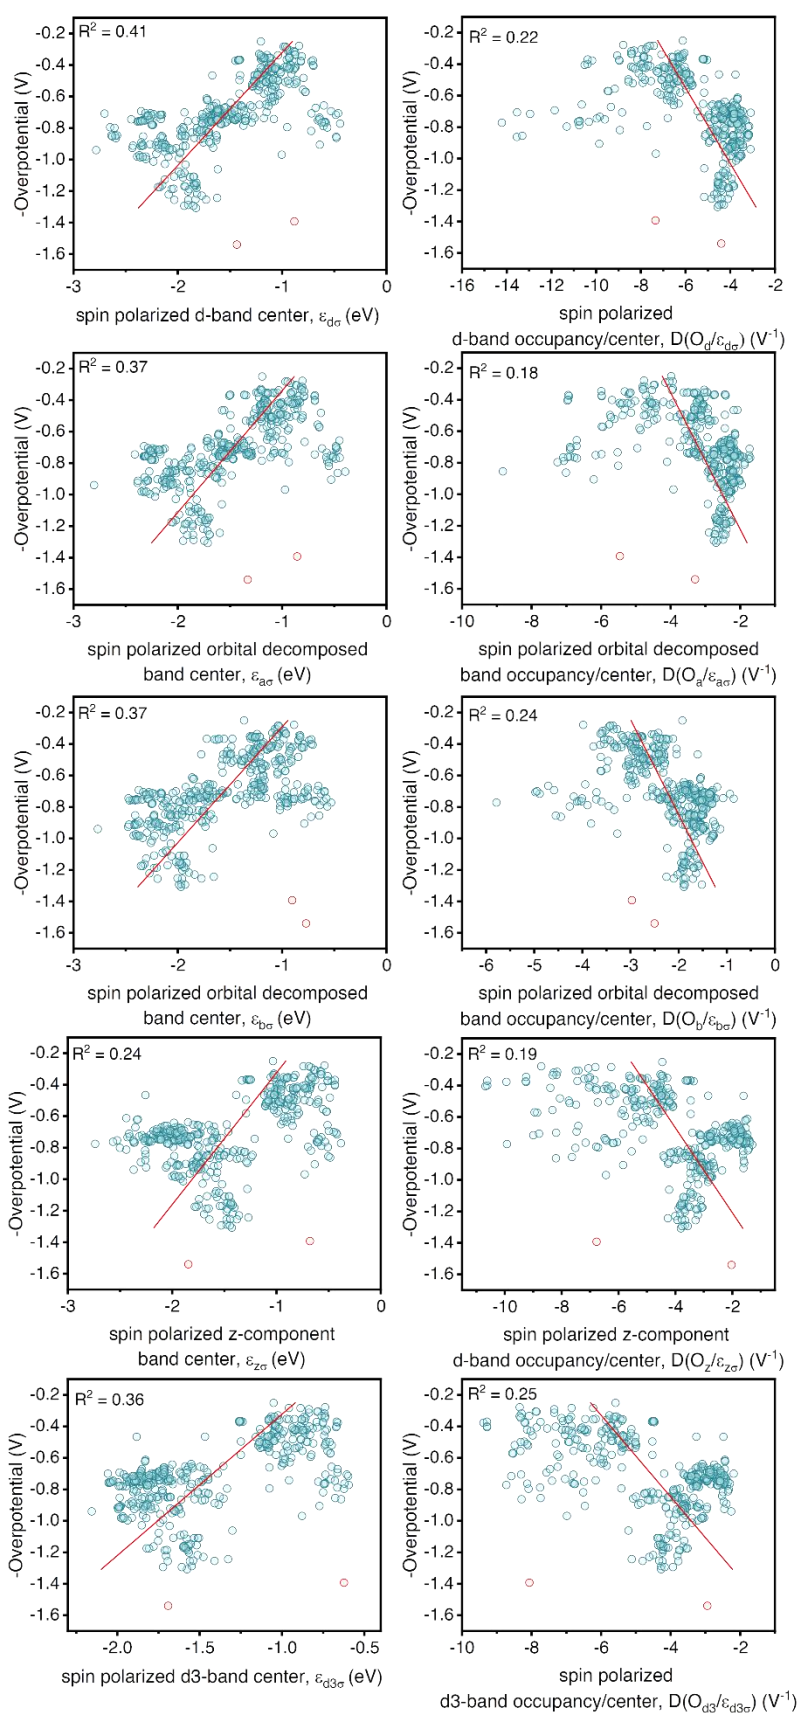

**Figure S8.** Spin effects included band centers and center scaled occupancy descriptors vs overpotentials.

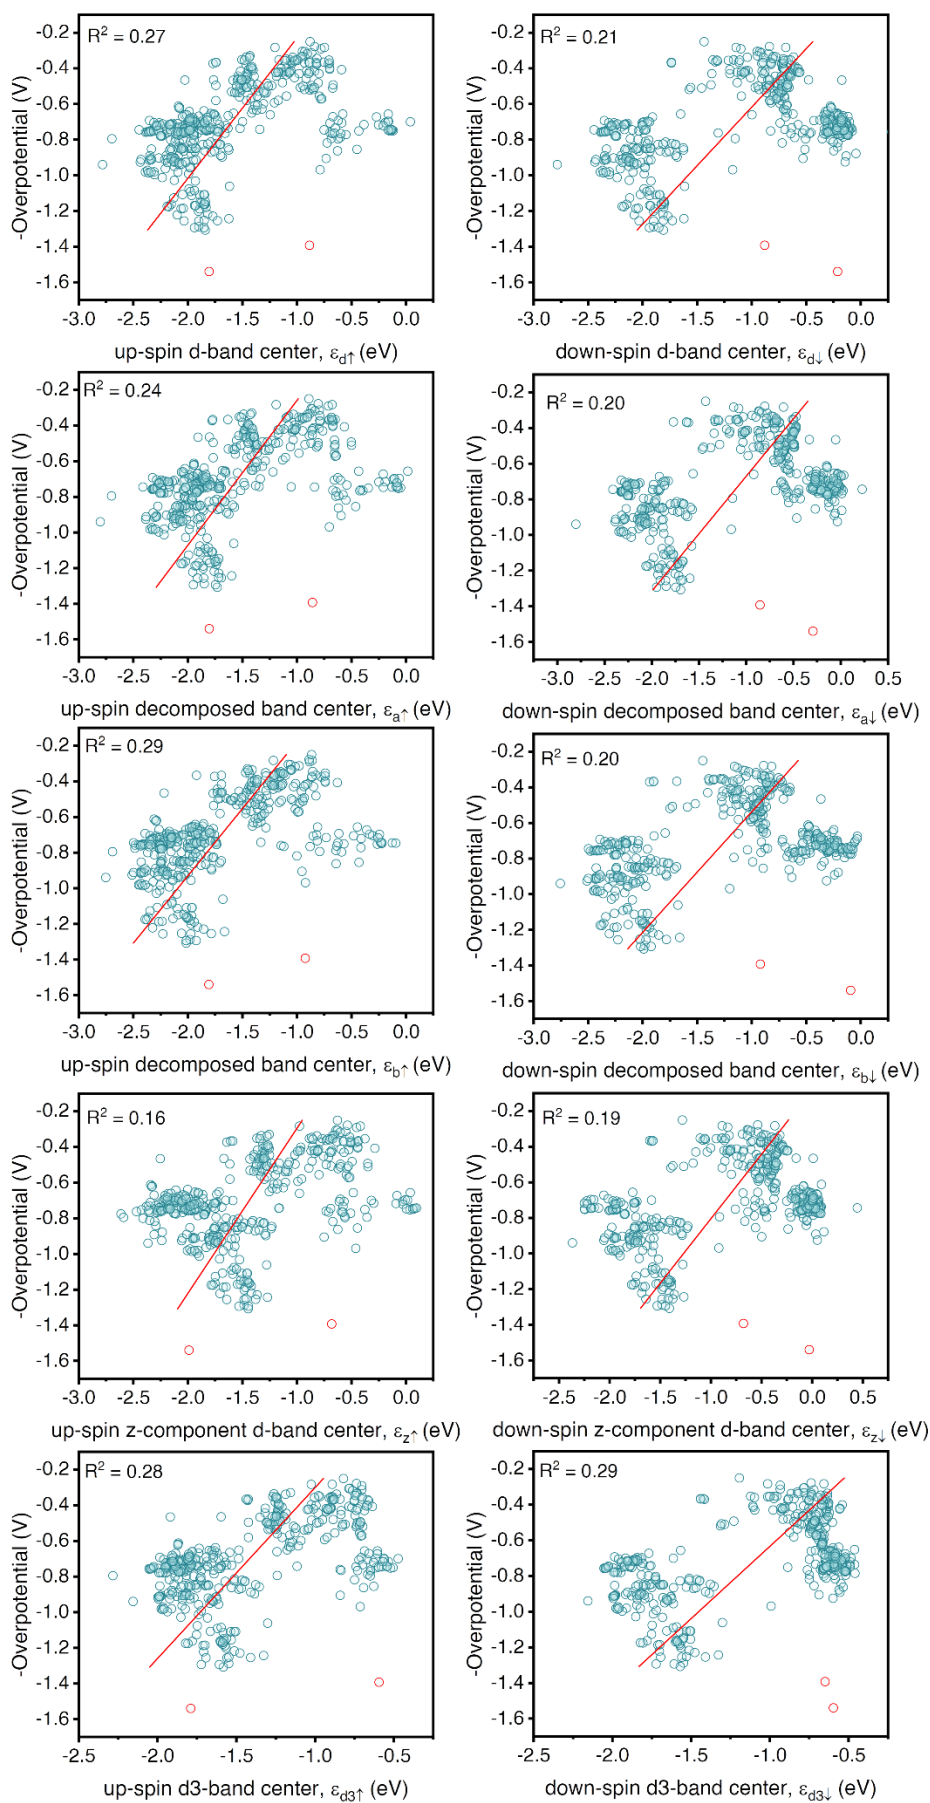

**Figure S9.** Individual spin component band centers vs overpotentials.

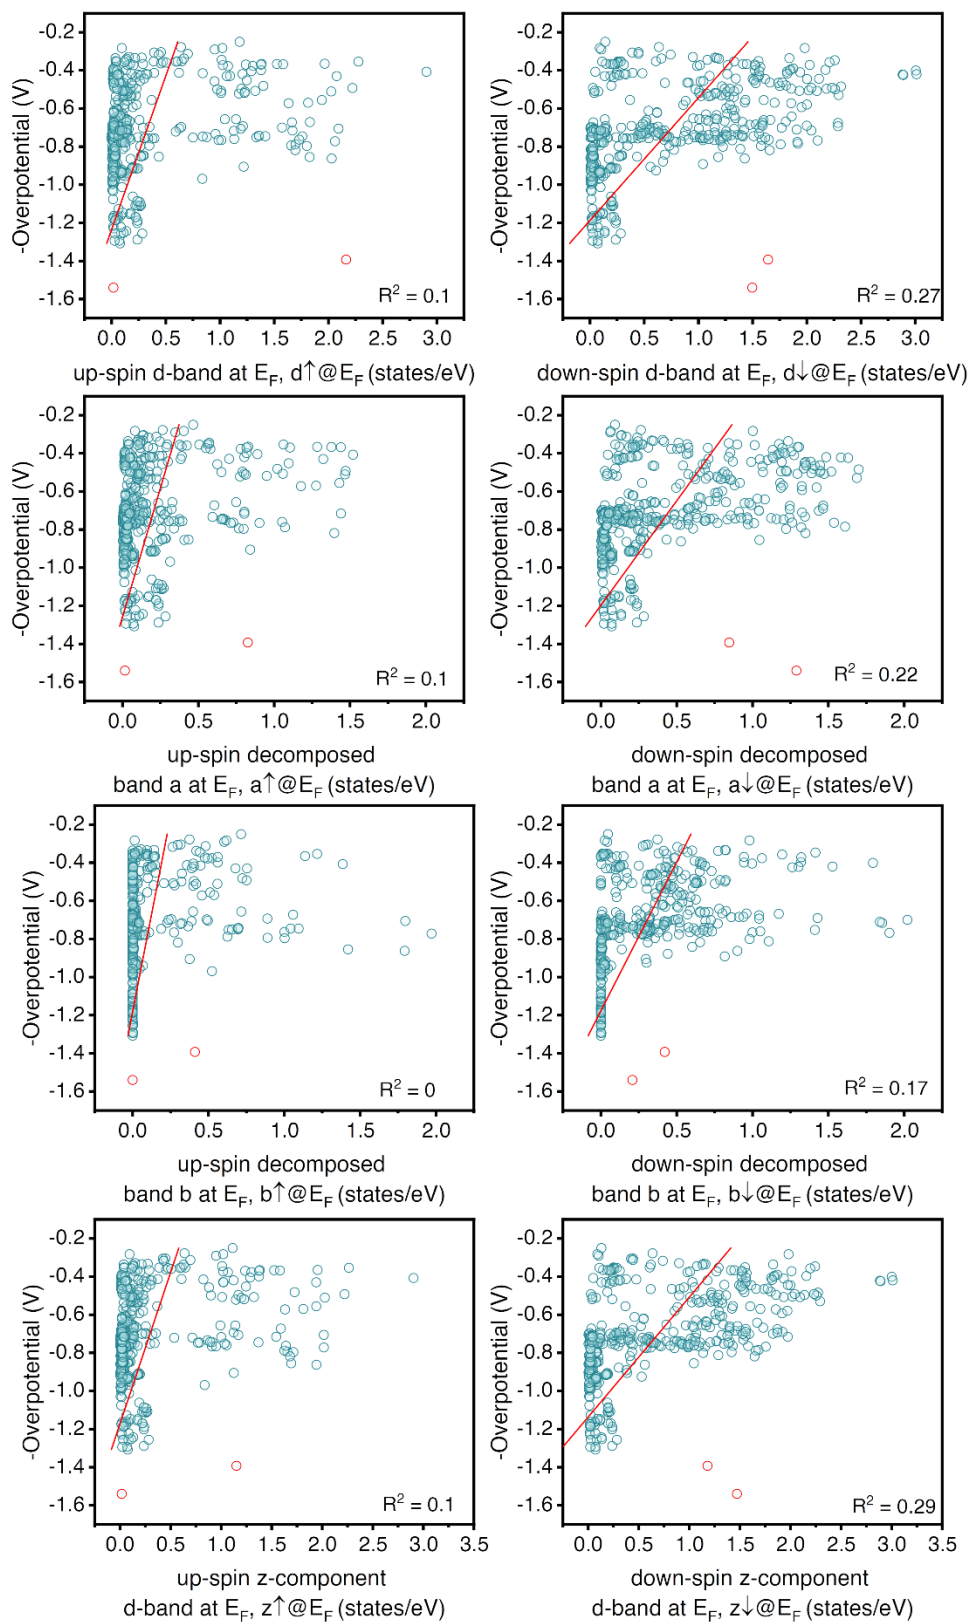

**Figure S10.** Individual spin component density of states of Fermi level descriptors vs overpotentials.

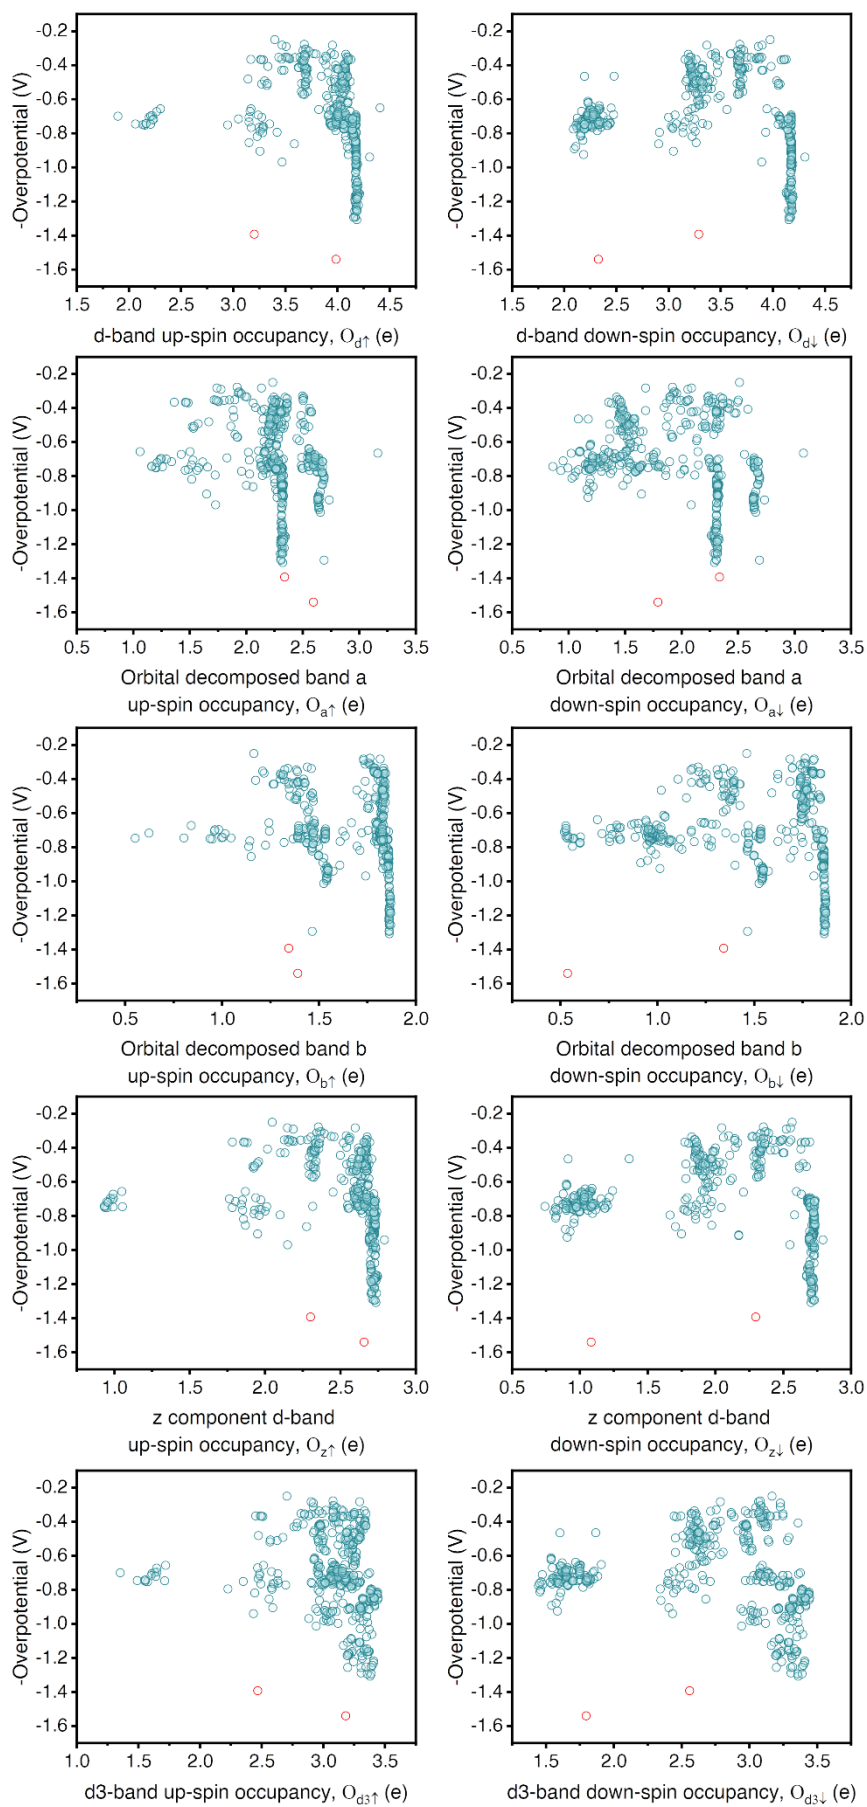

**Figure S11.** Individual spin component occupancy descriptors vs overpotentials.

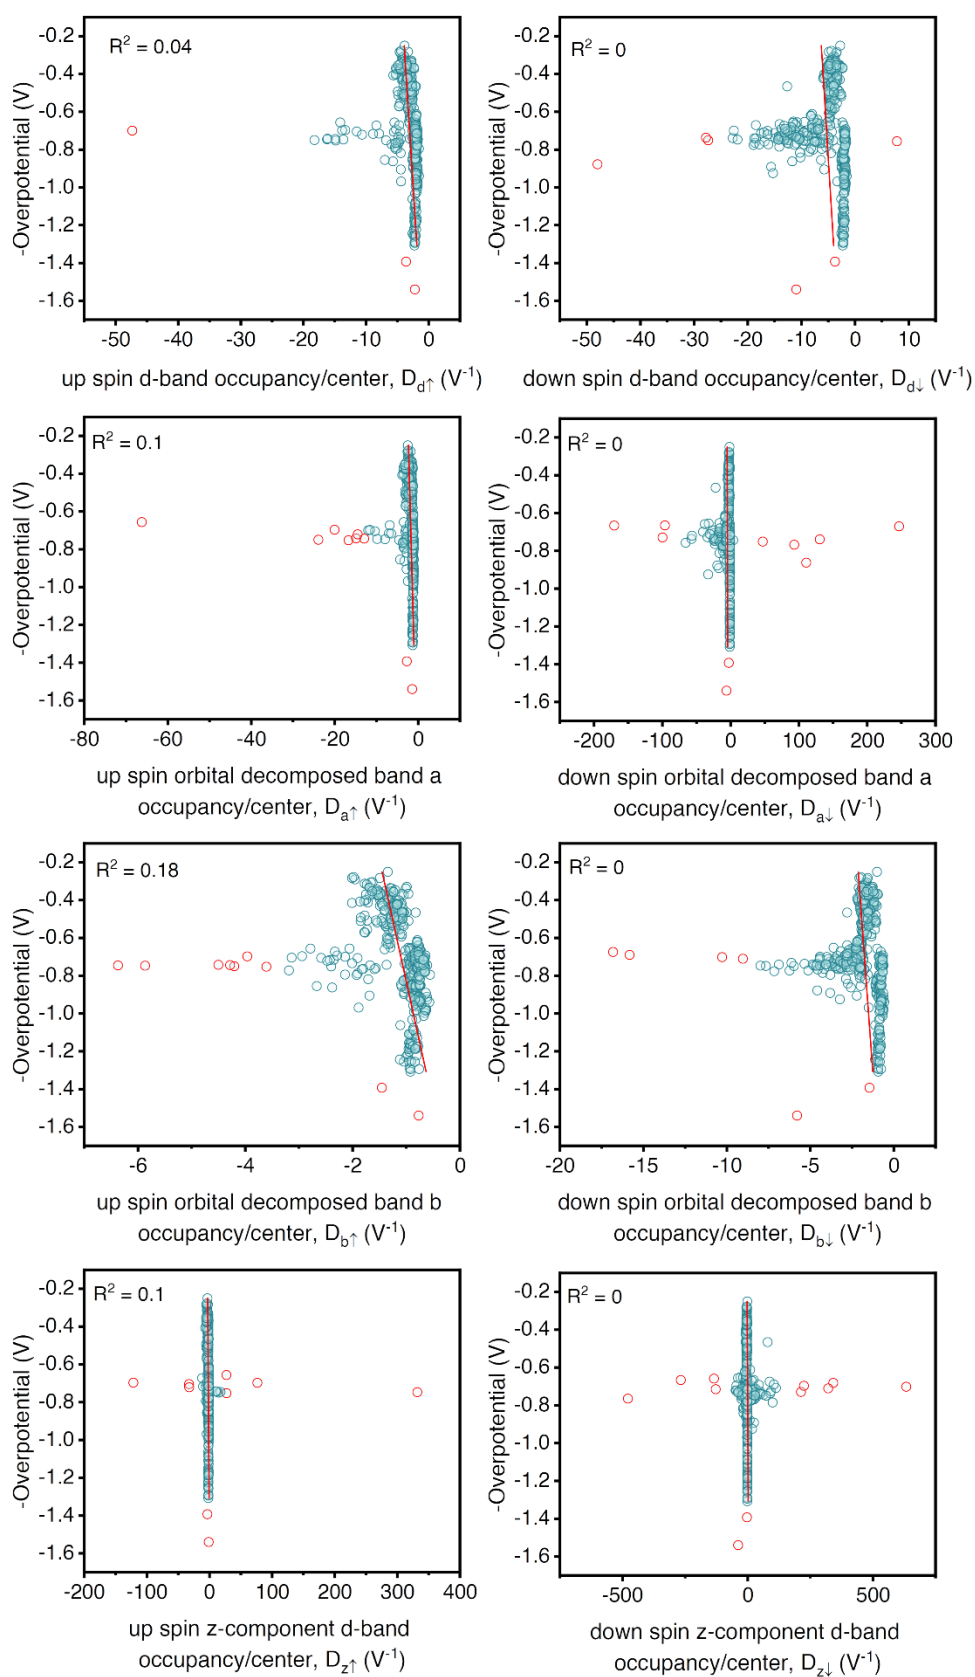

**Figure S12.** Individual spin component band center scaled occupancy descriptors vs overpotentials.

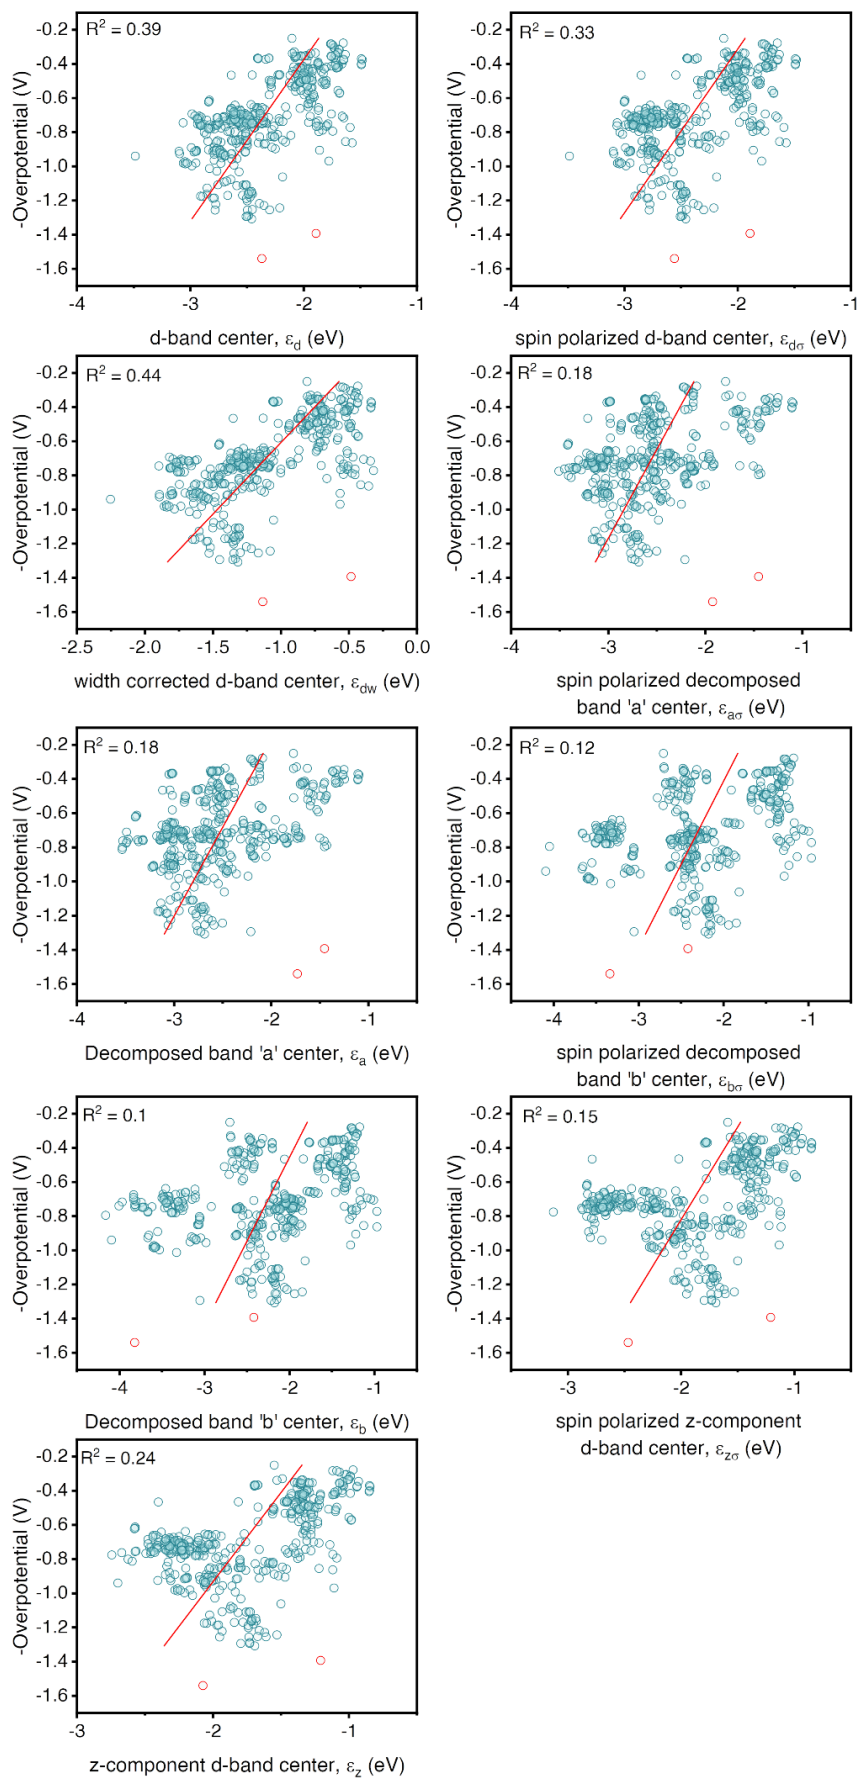

**Figure S13.** Band center and spin effects included band centers averaged from  $-\infty$  to  $E_F$  vs overpotentials.

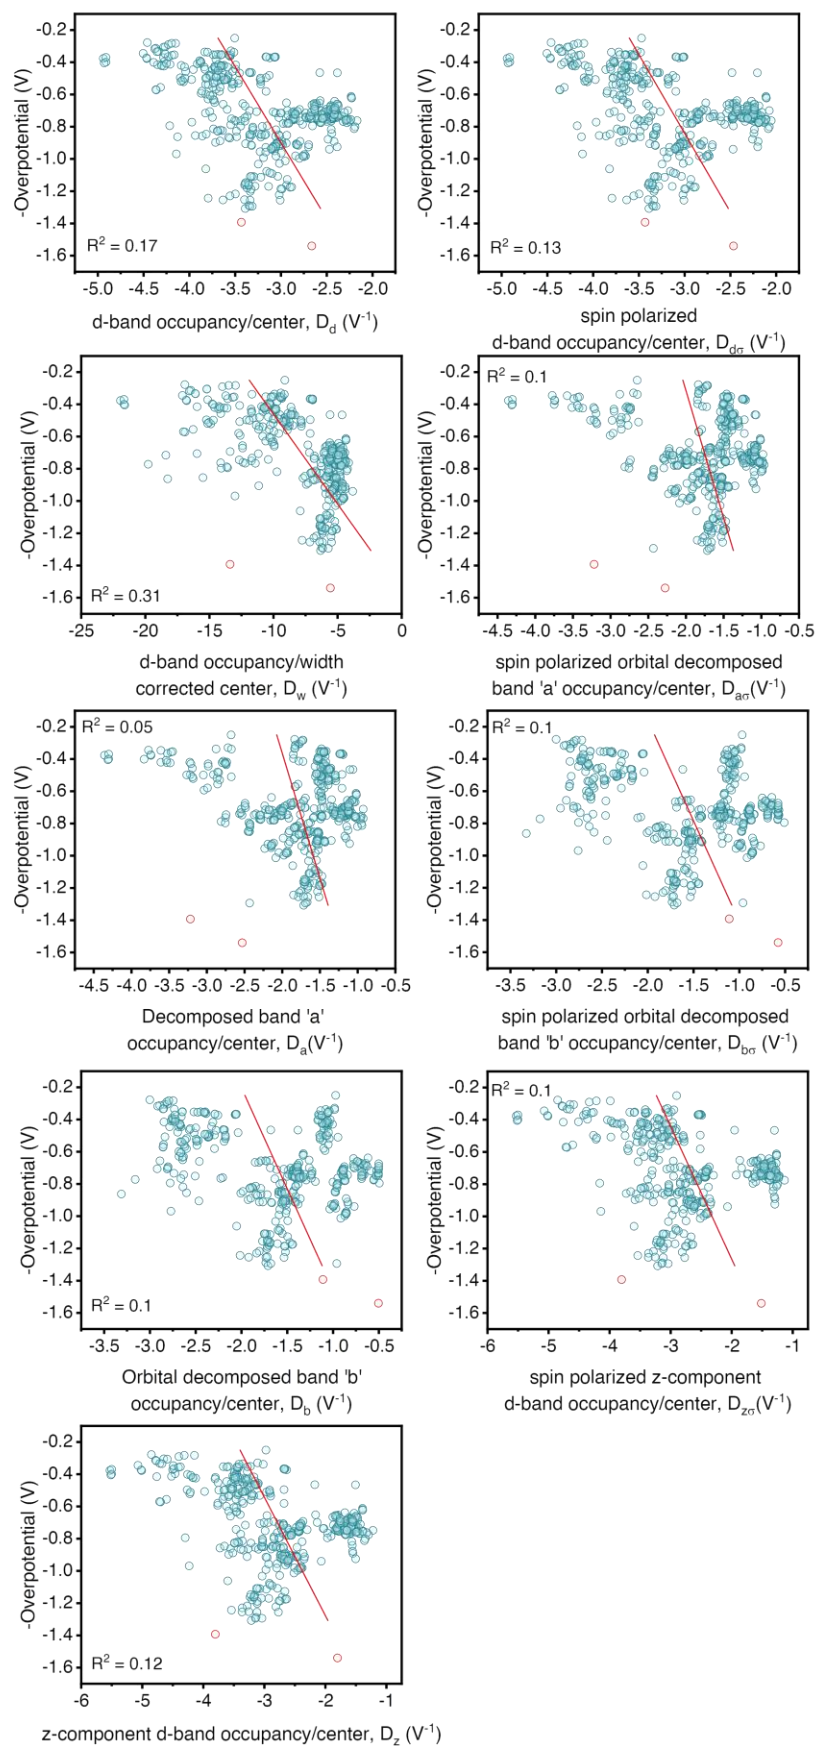

**Figure S14.** Band center scaled occupancy averaged from  $-\infty$  to  $E_F$  vs overpotentials.

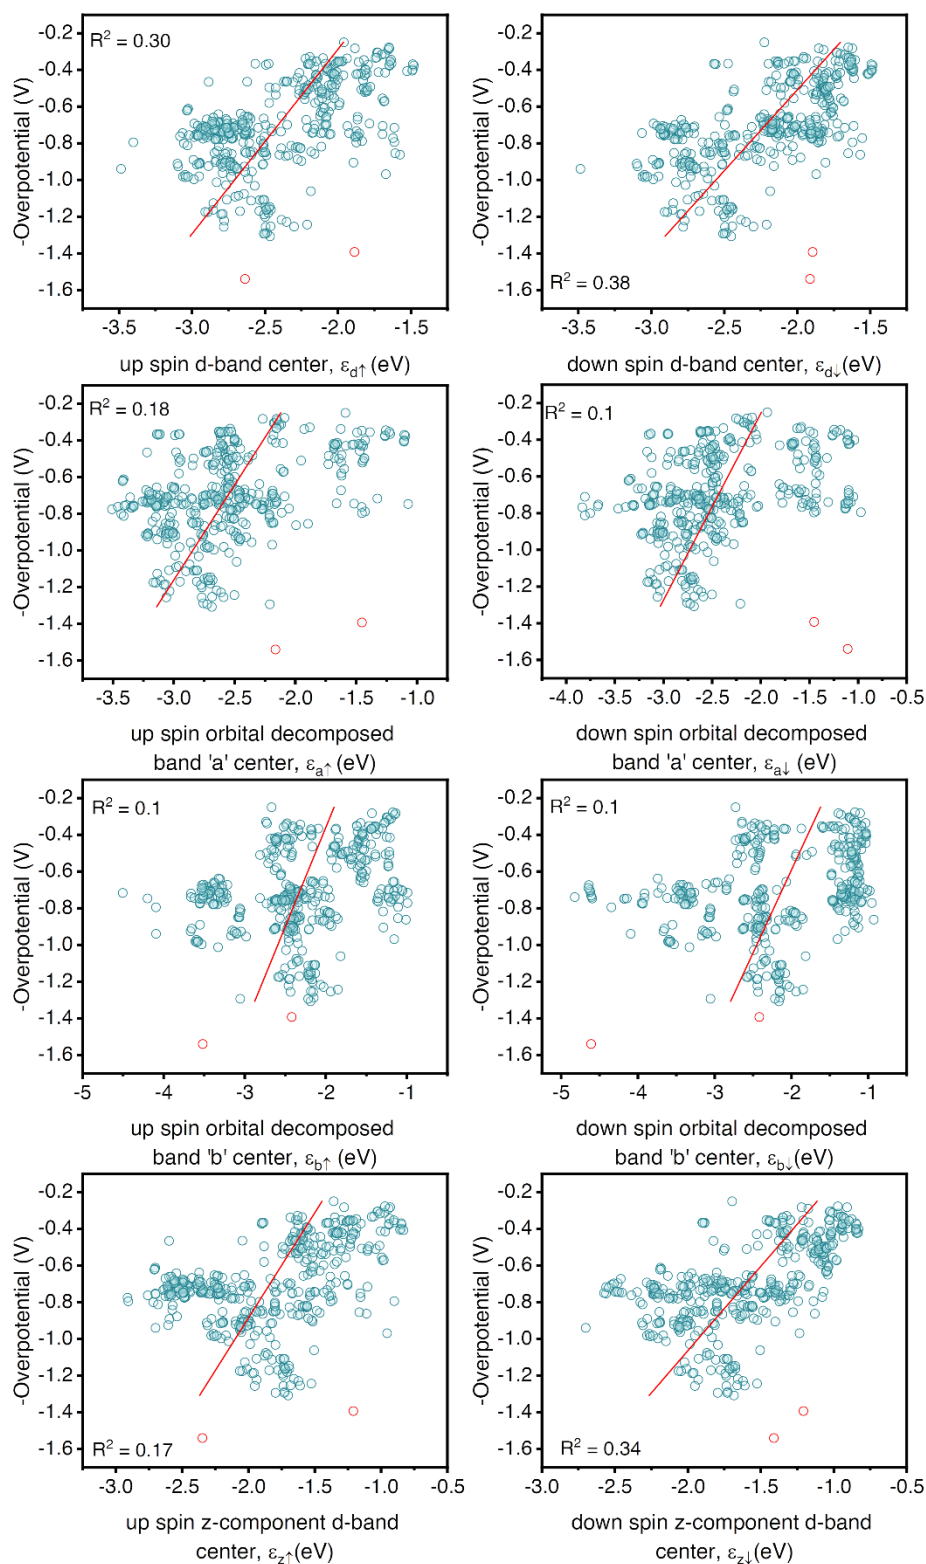

**Figure S15.** Individual spin component band centers averaged from  $-\infty$  to  $E_F$  vs overpotentials.



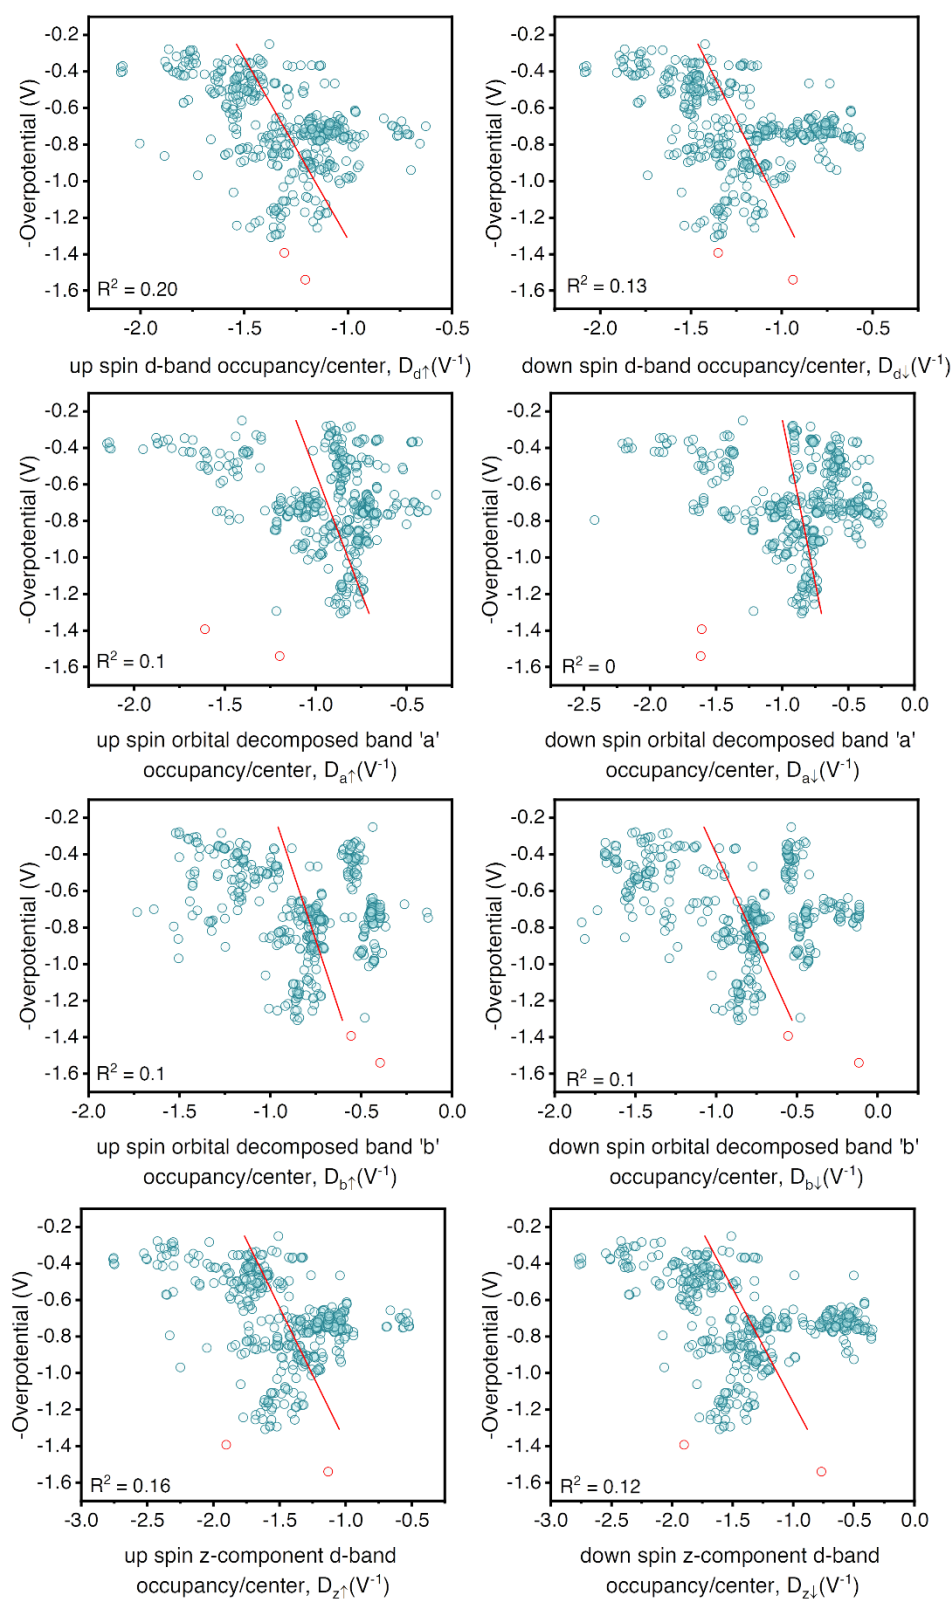

**Figure S16.** Individual spin component band center scaled occupancy descriptors averaged from  $-\infty$  to  $E_F$  vs overpotentials.

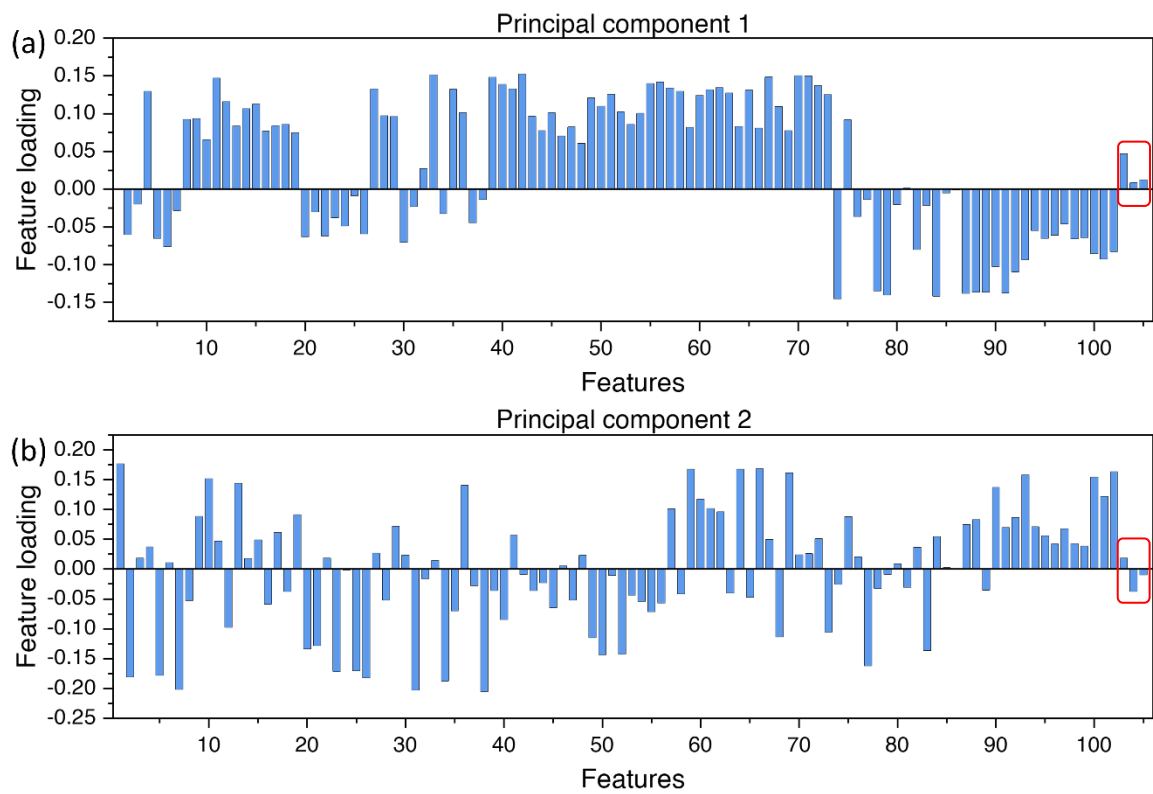

**Figure S17.** Features loading of the 105 features in the principal components (a) 1 and (b) 2.

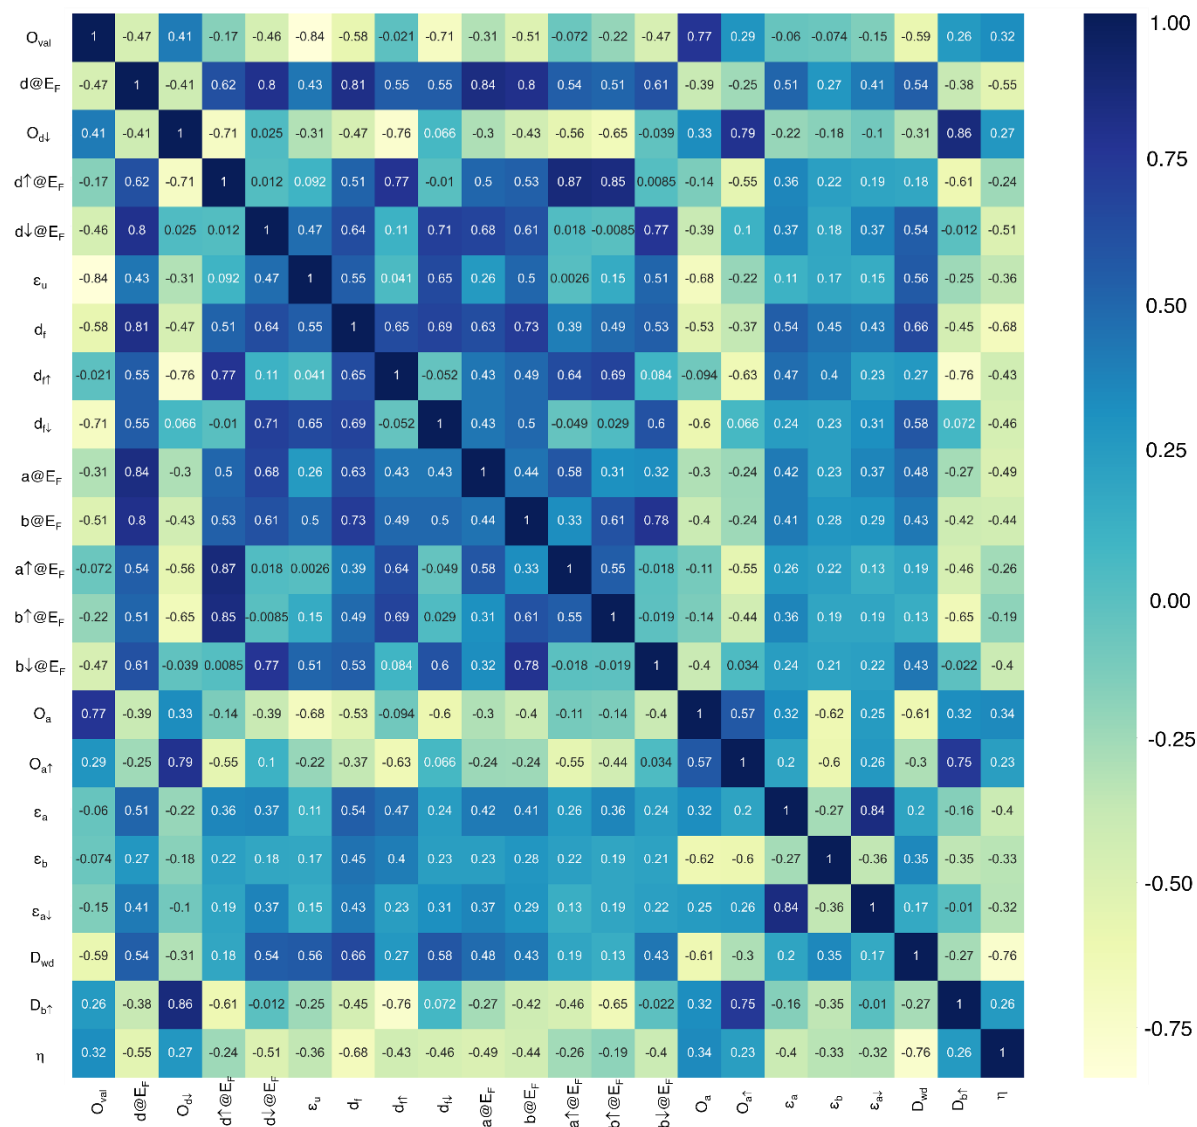

**Figure S18.** Correlation plot of the features filtered after PC analysis with overpotential.

**Python code for machine learning algorithms is as follows,**

```
#!/usr/bin/env python
# coding: utf-8

# ## Train the dataset on simple regression models , We will use the
following models
#
# * Ridge regression
# * Lasso regression
# * Random forest regressor
# * KNeighbours regressor
# * Support vector regressor

### import libraries
import pandas as pd
import matplotlib.pyplot as plt
import numpy as np
plt.rc('font', family='Helvetica')
plt.rc('axes', linewidth=2.5)
```

```

#read and visualize the data
df=pd.read_csv('pca_corr_filtered_data.csv')
cols=df.columns
df=df.drop(cols[0],axis=1)
df.head()

df.describe()

##separate the features

df_X=df.drop('y',axis=1)
df_X.head()

#separate the target
df_y=df['y']
df_y.head()

#training and testing set prepare
from sklearn.model_selection import train_test_split
X_train, X_test, y_train, y_test = train_test_split(df_X,df_y,
test_size=0.20, random_state=40)
print(X_train.shape)
print(X_test.shape)

#scale the features
from sklearn.preprocessing import StandardScaler
from sklearn.preprocessing import normalize

scaler = StandardScaler()

X_train = scaler.fit_transform(X_train)
X_test = scaler.transform(X_test)
print(X_train)
print(X_test)
# X_train = normalize(X_train)
# X_test = normalize(X_test)
#X_train[0]

##import the regression/classifier models

from time import time

from sklearn.linear_model import Ridge
from sklearn.linear_model import Lasso
from sklearn.ensemble import RandomForestRegressor
from sklearn.neighbors import KNeighborsRegressor
from sklearn.svm import SVR
from sklearn.linear_model import LinearRegression
from sklearn.linear_model import BayesianRidge

from sklearn.metrics import r2_score
from sklearn.metrics import mean_absolute_error
from sklearn.metrics import mean_squared_error

#define a dataframe where we will store the result

df_simple_reg =
pd.DataFrame(columns=['model_name', 'model_name_pretty', 'model_params', 'fit_
time', 'r2_train', 'mae_train',
                    'rmse_train'])

```

```

df_simple_reg

# Build a dictionary of model names
from collections import OrderedDict
simple_reg_model_names = OrderedDict({
    'rr': Ridge,
    'lr': Lasso,
    'rfr': RandomForestRegressor,
    'svr': SVR,
    'knr': KNeighborsRegressor,
    'mlr': LinearRegression,
    'bayesR': BayesianRidge
})

#define a function so that when we will call that function it will do the
regression and predict the result
def model_train_eval(model,X_train,Y_train):
    #Fit the model
    t = time()
    model=model()
    model.fit(X_train,Y_train)
    time_to_fit = time()-t

    #Evaluate the model
    y_actual = Y_train
    y_predicted = model.predict(X_train)

    #Get the scores
    r2_Score = r2_score(y_actual,y_predicted)
    mae = mean_absolute_error(y_actual,y_predicted)
    rmse = mean_squared_error (y_actual,y_predicted,squared=False)

    #Results
    result_dict = {
        'model_name': model_name,
        'model_name_pretty': type(model).__name__,
        'model_params': model.get_params(),
        'fit_time': time_to_fit,
        'r2_train': r2_Score,
        'mae_train': mae,
        'rmse_train': rmse}
    return result_dict

simple_reg_models = OrderedDict()
# Loop through each model type, fit and predict, and evaluate and store
results
for model_name, model in simple_reg_model_names.items():
    print(f'Currently running {model_name}: {model.__name__}')
    result_dict = model_train_eval(model, X_train, y_train)
    df_simple_reg = df_simple_reg.append(result_dict, ignore_index=True)

#df_simple_reg
## Get the best fit model based on r2score
df_simple_reg = df_simple_reg.sort_values('r2_train', ignore_index=True)
df_simple_reg

# Get the parameters of the best performing model
best_r2score_train= df_simple_reg.iloc[-1, :].copy()

```

```

model =
simple_reg_model_names[best_r2score_train['model_name']] (**best_r2score_train['model_params'])
model.fit(X_train, y_train)

best_r2score_train['model_params']

##print r2_score_tests
y_act_test = y_test
y_pred_test = model.predict(X_test)

r2 = r2_score(y_act_test, y_pred_test)
mae = mean_absolute_error(y_act_test, y_pred_test)
rmse = mean_squared_error(y_act_test, y_pred_test, squared=False)

print(f'r2: {r2:0.4f}')
print(f'mae: {mae:0.4f}')
print(f'rmse: {rmse:0.4f}')

##define a function which will show the visualization of plots of prediction
def plot_pred_vs_act(act, pred, model, label=''):
    xy_max = np.max([np.max(act), np.max(pred)])
    plot = plt.figure(figsize=(10,10))
    plt.plot(act, pred, 'o', ms=15, mec='b', mfc='silver', alpha=0.8)
    plt.plot([0, xy_max], [0, xy_max], 'k--', label='ideal')
    plt.axis('scaled')
    plt.xlabel(f'Actual',fontsize=16)
    plt.ylabel(f'Predicted',fontsize=16)
    plt.title(f'{type(model).__name__}, r2: {r2_score(act, pred):0.4f}',fontsize=16)
    plt.legend(loc='upper left',fontsize=14)
    plt.tick_params(which='major',left = True, right = False , labelleft = True ,
                    labelbottom = True, bottom = True,direction="in",width = 2,length = 4)
    plt.xticks(fontsize = 16)
    plt.yticks(fontsize = 16)

    return plot

plot = plot_pred_vs_act(y_act_test, y_pred_test, model)

# ## Linear Regression

def plot_pred_vs_act2(act, pred, model,r2_score, label=''):
    xy_max = np.max([np.max(act), np.max(pred)])
    plot = plt.figure(figsize=(10,10))
    plt.plot(act, pred, 'o', ms=15, mec='b', mfc='silver', alpha=0.8)
    plt.plot([0, xy_max], [0, xy_max], 'k--', label='ideal')
    plt.axis('scaled')
    plt.xlabel(f'Actual',fontsize=16)
    plt.ylabel(f'Predicted',fontsize=16)
    ##plt.title(f'{model}, r2: {r2_score:0.4f}',fontsize=16)
    plt.legend(loc='upper left',fontsize=14)
    plt.tick_params(which='major',left = True, right = False , labelleft = True ,
                    labelbottom = True, bottom = True,direction="in",width = 2,length = 4)

```

```

plt.xticks(fontsize = 16)
plt.yticks(fontsize = 16)

return plot

cols1=['x1','x2','target','coef1','coef2','intercept','r2_test','r2_train']
res1=pd.DataFrame(columns=cols1)
def do_lin_reg(X_train,y_train,X_test,y_test):

    # Create an instance of the LinearRegression class
    reg = LinearRegression()

    # Fit the model to the data
    reg.fit(X_train, y_train)
    #Coefficients
    #print(reg.coef_)
    #Intercept
    #print(reg.intercept_)
    #r2_score
    y_pred=reg.predict(X_test)
    r2_test=r2_score(y_test, y_pred)
    y_pred_train=reg.predict(X_train)
    r2_train=r2_score(y_train, y_pred_train)
    mae = mean_absolute_error(y_test, y_pred)
    rmse = mean_squared_error(y_test, y_pred, squared=False)
    #print(r2)
    y_pred_df=pd.DataFrame(data=y_pred,columns=[df.columns[-1]])
    #plot = plot_pred_vs_act2(y_test,y_pred,'mlr',r2_score)
    return [reg.coef_,reg.intercept_,r2_test,r2_train,mae,rmse]

cols_x=df_X.columns
#cols_x
#####m mlr with combination of 2
for i in range(len(cols_x)):
    for j in range(i+1,len(cols_x)):
        X_train_new=[]
        X_test_new=[]
        for ele in X_train:
            small_arr=[ele[i],ele[j]]
            X_train_new.append(small_arr)
        for ele in X_test:
            small_arr=[ele[i],ele[j]]
            X_test_new.append(small_arr)
        res_reg=do_lin_reg(X_train_new,y_train,X_test_new,y_test)

row_to_append=[cols_x[i],cols_x[j],'overpotential',res_reg[0][0],res_reg[0]
[1],res_reg[1],res_reg[2],res_reg[3]]
    res1.loc[len(res1.index)] = row_to_append

res1.sort_values(by="r2_test",ascending=False)

#checking with linear regression so that if there is a good linear
correlation we can predict some equation

# Create an instance of the LinearRegression class
reg = LinearRegression()
# Fit the model to the data
reg.fit(X_train, y_train)

print(reg.coef_)

```

```

print(reg.intercept_)

y_pred=reg.predict(X_test)
r2=r2_score(y_test, y_pred)
#r2
#adjusted_r2
adjustd_r_sqr = 1.0 - (1.0 - r2)*(len(y_test)-1)/(len(y_test)-
X_test.shape[1]-1)
#adjustd_r_sqr
y_pred_df=pd.DataFrame(data=y_pred,columns=[df.columns[-1]])

#changing the previously defined plotting function little bit according to
the convenience
def plot_pred_vs_act2(act, pred, model,r2_score, label=''):
    xy_max = np.max([np.max(act), np.max(pred)])
    plot = plt.figure(figsize=(10,10))
    plt.plot(act, pred, 'o', ms=15, mec='b', mfc='silver', alpha=0.8)
    plt.plot([0, xy_max], [0, xy_max], 'k--', label='ideal')
    plt.axis('scaled')
    plt.xlabel(f'Actual',fontsize=37,family='Helvetica')
    plt.ylabel(f'Predicted',fontsize=37)
    # plt.title(f'{model}, r2: {r2_score}',fontsize=37)
    ##plt.title(f'{model}, r2: {r2_score:0.4f}',fontsize=16)
    # plt.legend(loc='upper left',fontsize=30)
    plt.tick_params(which='major',left = True, right = False , labelleft =
True ,
                    labelbottom = True, bottom = True,direction="out",width =
2,length = 4)
    plt.text(0.01,1.2,f'R$^{2}$= {format(r2_score, ".2f")}', fontsize = 32)
    plt.xticks(fontsize = 30)
    plt.yticks(fontsize = 30)

    return plot

plot = plot_pred_vs_act2(y_test,y_pred,'mlr',r2)

#selecting the best random_state
seeds=[i for i in range(100)]
dat_col=['seed','coef1','coef2','intercept','r2_test','r2_train','mae','rms
e']
dat=pd.DataFrame(columns=dat_col)
for seed in seeds:
    X_train, X_test, y_train, y_test = train_test_split(df_X,df_y,
test_size=0.20, random_state=seed)
    #print(X_train.shape)
    #print(X_test.shape)
    res_reg=do_lin_reg(X_train,y_train,X_test,y_test)

row_to_append=[int(seed),res_reg[0][0],res_reg[0][1],res_reg[1],res_reg[2],
res_reg[3],res_reg[4],res_reg[5]]
    dat.loc[len(dat.index)] = row_to_append
dat_sort=dat.sort_values(by="r2_test",ascending=False)

dat_sort.to_csv("dat_col.csv")
df_seed_based_df=pd.read_csv("dat_col.csv")
##df_seed_based_df.head()
seed=int(df_seed_based_df['seed'][0])
#seed

##splitting the dataset according to best random state and repeating the
previous steps

```



```

X_train, X_test, y_train, y_test = train_test_split(df_X,df_y,
test_size=0.20, random_state=seed)
print(X_train.shape)
print(X_test.shape)

scaler = StandardScaler()

X_train = scaler.fit_transform(X_train)
X_test = scaler.transform(X_test)
# print(X_train)
# print(X_test)

new_result_train_df=pd.DataFrame()
new_result_test_df=pd.DataFrame()
new_result_train_df['Actual']=y_train.tolist()
new_result_test_df['Actual']=y_test.tolist()
#new_result_train_df
# X_train

r2_train=[]
r2_test=[]
def
give_the_model_and_get_plot(X_train,X_test,y_train,y_test,model,model_name)
:
    # Create an instance of the model class
    reg = model()
    reg.fit(X_train, y_train)
    y_pred=reg.predict(X_test)
    y_pred_train=reg.predict(X_train)
    new_result_train_df[f'{model_name}_pred']=y_pred_train.tolist()
    new_result_test_df[f'{model_name}_pred']=y_pred.tolist()
    r2_test_val=r2_score(y_test, y_pred)
    r2_train_val=r2_score(y_train, y_pred_train)
    #plot = plot_pred_vs_act2(y_test,y_pred,model_name,r2)
    return r2_test_val,r2_train_val

for model_name, model in simple_reg_model_names.items():

r2_test_val,r2_train_val=give_the_model_and_get_plot(X_train,X_test,y_train
,y_test,model,model_name)
    r2_train.append(r2_train_val)
    r2_test.append(r2_test_val)
r2_df=pd.DataFrame()
#r2_df.columns=["train","test"]
r2_df.index=["Ridge","Lasso","RandomForestRegressor","SVR","KNeighborsRegre
ssor","LinearRegression","BayesianRidge"]
r2_df["train"]=r2_train
r2_df["test"]=r2_test
r2_df

#trying with xgboost also
import xgboost as xgb
from sklearn.preprocessing import LabelEncoder
le = LabelEncoder()
y_train = le.fit_transform(y_train)

# Use "hist" for constructing the trees, with early stopping enabled.
clf = xgb.XGBClassifier(tree_method="hist", early_stopping_rounds=50)
# Fit the model, test sets are used for early stopping.
clf.fit(X_train, y_train, eval_set=[(X_test, y_test)])
# Save model into JSON format.
clf.save_model("clf.json")

```

```

from sklearn.metrics import mean_squared_error

preds1 = clf.predict(X_test)
preds2 = clf.predict(X_train)
xgb_test_pred=le.inverse_transform(preds1)
xgb_train_pred=le.inverse_transform(preds2)
new_result_train_df['xgb']=xgb_train_pred.tolist()
new_result_test_df['xgb']=xgb_test_pred.tolist()
r2_xgb_train=r2_score(y_train, xgb_train_pred)
r2_xgb_test=r2_score(y_test, xgb_test_pred)
r2_index=r2_df.index.tolist()
r2_index.append('xgb')
#r2_df.index=r2_index
print([r2_xgb_train,r2_xgb_test])
#r2_df
learn = XGBClassifier()
learn.fit(X_train, y_train)
print (learn)

#saving the prediction of training and testing datasets
new_result_train_df.to_csv("train_pred.csv")
new_result_test_df.to_csv("test_pred.csv")
#saving the r2_score of each model
r2_df.to_csv("r2.csv")
r2_df

```

## References:

- (1) Nørskov, J. K.; Rossmeisl, J.; Logadottir, A.; Lindqvist, L.; Kitchin, J. R.; Bligaard, T.; Jónsson, H. Origin of the Overpotential for Oxygen Reduction at a Fuel-Cell Cathode. *J. Phys. Chem. B* **2004**, *108* (46), 17886–17892. <https://doi.org/10.1021/jp047349j>.
